# Supplementary material for: A Review of Novel Combinations of Colistin and Lipopeptide or Glycopeptide Antibiotics for the Treatment of Multidrug-Resistant Acinetobacter baumannii
Source: PubMed Central journal article supplement — Infect Dis Ther. 2014 Dec 5;3(2):69–81. doi: 10.1007/s40121-014-0051-9 (PMC4269621; doi:10.1007/s40121-014-0051-9), 2014-12-05
Supplement: 40121_2014_51_MOESM1_ESM.pdf [file 40121_2014_51_MOESM1_ESM.pdf]

- *Acinetobacter baumannii*, particularly multi-drug resistant *A. baumannii* (MDRAB), pose a serious risk secondary to the lack of effective antimicrobials available or in the pipeline to treat infections caused by these organisms.
- Novel treatment modalities using currently available agents have proved favorable, primarily through *in vitro* studies.
- A unique combination currently being investigated is that of colistin with either lipopeptides or glycopeptides, that are able to bypass the lipopolysaccharide layer due to the action of colistin.
- Results from several *in vitro* and *in vivo* studies demonstrate bactericidal activity against colistin susceptible isolates for all types of lipopeptides and glycopeptides with mixed results for colistin resistant isolates.
- There is little in terms of clinical data to determine the translatability of these findings.

This summary slide represents the opinions of the authors. For a full list of acknowledgments and conflicts of interest for all authors of this article, please see the full text online. Copyright © The Authors 2014. Creative Commons Attribution Noncommercial License (CC BY-NC).
